# Supplementary material for: Osteocalcin Alleviates Lipopolysaccharide-Induced Acute Inflammation via Activation of GPR37 in Macrophages
Source: MDPI journal article supplement (doi:10.3390/biomedicines10051006), 2022-04-27
Supplement: s1 [file s1]

Supplementary Materials of this study

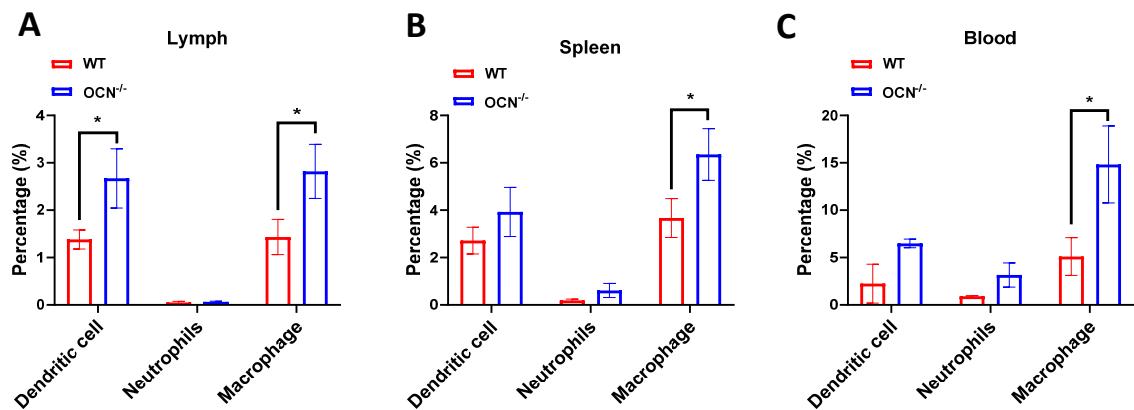

**Supplementary Figure S1.** Flow cytometry analysis of dendritic cell, neutrophils and macrophage in lymph (A), spleen (B) and blood (C) from WT and OCN<sup>-/-</sup> mice. n = 2 mice; Values represent mean ± SD. \* p<0.05 as compared to WT.

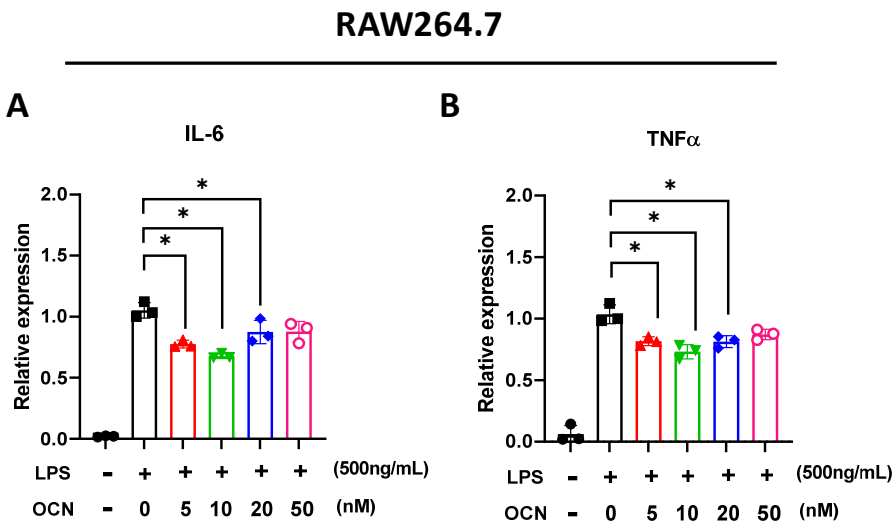

**Supplementary Figure S2.** OCN inhibits the mRNA expression of pro-inflammatory genes, i.e., IL-6 (A) and TNF (B) in LPS (500 ng/mL) treated RAW264.7 cells. Data are presented as means ± SD (n = 3 biological replicates). \* p<0.05 as compared to PBS.

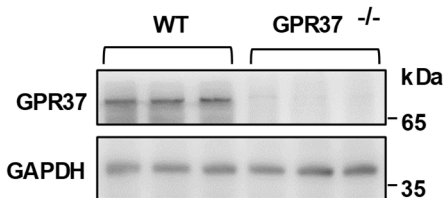

**Supplementary Figure S3.** Peritoneal macrophages were isolated from WT and GPR37<sup>-/-</sup> mice and then western blot was performed to confirm the expression of GPR37 in macrophage (n = 3 mice).
